# Supplementary material for: Inadequate prenatal care use and breastfeeding practices in Canada: a national survey of women
Source: Springer Nature journal article supplement (doi:10.1186/s12884-016-0889-9), 2016-05-05
Supplement: MOESM1 [file 10110846]

**Table 1: Bivariate analysis and unadjusted association of breastfeeding intention, initiation, 6-month exclusive breastfeeding and breastfeeding termination at 6 months with inadequate prenatal care and other potential predictors**

| Independent Variables                       | Intended to Breastfeed<br>(N=5620 [87.5%] <sup>‡</sup> ) |                                       | Initiated Breastfeeding<br>(N=5623 [87.6%] <sup>‡</sup> ) |                                       | Terminated Breastfeeding at 6<br>months (N=4394 [68.4%] <sup>‡</sup> ) |                                       | Exclusive Breastfeeding at 6-<br>months (N=4820 [75.0%] <sup>‡</sup> ) |                                       |
|---------------------------------------------|----------------------------------------------------------|---------------------------------------|-----------------------------------------------------------|---------------------------------------|------------------------------------------------------------------------|---------------------------------------|------------------------------------------------------------------------|---------------------------------------|
|                                             | N (%)*                                                   | Unadjusted<br>OR (95%CI) <sup>†</sup> | N (%)*                                                    | Unadjusted<br>OR (95%CI) <sup>†</sup> | N (%)*                                                                 | Unadjusted<br>OR (95%CI) <sup>†</sup> | N (%)*                                                                 | Unadjusted<br>OR (95%CI) <sup>†</sup> |
| <b>Adequacy of Services</b>                 |                                                          |                                       |                                                           |                                       |                                                                        |                                       |                                                                        |                                       |
| Adequate                                    | 3547 (76.4)                                              | <b>1.19 (1.00-1.41)</b>               | 4176(89.9)                                                | 1.03 (0.78-1.26)                      | 2183(60.4)                                                             | 1.02 (0.87-1.20)                      | 597 (15.0)                                                             | 0.99 (0.80-1.24)                      |
| Inadequate                                  | 712 (73.0)                                               | 1.00                                  | 877(89.9)                                                 | 1.00                                  | 465 (59.7)                                                             | 1.00                                  | 128 (15.0)                                                             | 1.00                                  |
| <b>Adequacy of Initiation</b>               |                                                          |                                       |                                                           |                                       |                                                                        |                                       |                                                                        |                                       |
| Weeks 1-17                                  | 4184 (75.9)                                              | 1.27 (0.81-1.99)                      | 4964(90.0)                                                | <b>1.74 (1.05-2.86)</b>               | 2597(60.2)                                                             | 1.93 (0.57-1.50)                      | 711 (15.1)                                                             | 1.06 (0.53-2.10)                      |
| Weeks 18 and above                          | 76 (71.2)                                                | 1.00                                  | 88(83.8)                                                  | 1.00                                  | 51 (62.0)                                                              | 1.00                                  | 14.1 (14.3)                                                            | 1.00                                  |
| <b>Maternal Demographics</b>                |                                                          |                                       |                                                           |                                       |                                                                        |                                       |                                                                        |                                       |
| <b>Maternal age in years</b>                |                                                          |                                       |                                                           |                                       |                                                                        |                                       |                                                                        |                                       |
| <20                                         | 116 (72.0)                                               | 1.00                                  | 133(83.4)                                                 | 1.00                                  | 33(26.5)                                                               | 1.00                                  | 8 (5.3)                                                                | 1.00                                  |
| 20-39                                       | 4012 (76.0)                                              | 1.22 (0.91-1.65)                      | 4757(90.0)                                                | <b>1.80 (1.28-2.50)</b>               | 2513(60.8)                                                             | <b>4.30(3.05-6.03)</b>                | 688 (15.2)                                                             | <b>3.20(1.69-6.07)</b>                |
| >=40                                        | 124 (76.0)                                               | 1.23(0.76-1.98)                       | 149(90.8)                                                 | <b>1.96 (1.00-3.83)</b>               | 96 (77.6)                                                              | <b>9.56 (5.45-11.75)</b>              | 30 (22.3)                                                              | <b>5.12 (2.33-11.23)</b>              |
| <b>Urban-rural residence</b>                |                                                          |                                       |                                                           |                                       |                                                                        |                                       |                                                                        |                                       |
| Rural area                                  | 735 (74.7)                                               | 1.00                                  | 854(87.0)                                                 | 1.00                                  | 423 (56.3)                                                             | 1.00                                  | 121 (14.3)                                                             | 1.00                                  |
| Urban, population ≤499,999                  | 1525 (75.7)                                              | 1.05(0.88-1.25)                       | 1770(87.8)                                                | 1.09 (0.87-1.36)                      | 855 (56.2)                                                             | 0.99 (0.83-1.18)                      | 229 (13.5)                                                             | 0.93 (0.73-1.17)                      |
| Urban, population ≥500,000                  | 1874 (76.7)                                              | 1.11(0.93-1.33)                       | 2262(92.6)                                                | <b>1.88 (1.48-2.40)</b>               | 1288 (65.3)                                                            | <b>1.45 (1.22-1.73)</b>               | 350 (16.5)                                                             | 1.18 (0.93-1.48)                      |
| <b>Immigration to Canada</b>                |                                                          |                                       |                                                           |                                       |                                                                        |                                       |                                                                        |                                       |
| No                                          | 3366 (76.5)                                              | 1.18 (1.00-1.39)                      | 3870(87.4)                                                | 0.73(0.60-1.12)                       | 1924 (57.4)                                                            | 0.60 (0.49-0.70)                      | 527 (14.0)                                                             | 0.72 (0.59-0.88)                      |
| Yes                                         | 878 (73.3)                                               | 1.00                                  | 1161(96.9)                                                | 1.00                                  | 712 (69.6)                                                             | 1.00                                  | 193 (18.4)                                                             | 1.00                                  |
| <b>Level of education</b>                   |                                                          |                                       |                                                           |                                       |                                                                        |                                       |                                                                        |                                       |
| High school or less                         | 762 (67.2)                                               | 1.00                                  | 935 (82.4)                                                | 1.00                                  | 373 (44.8)                                                             | 1.00                                  | 73 (7.6)                                                               | 1.00                                  |
| Some postsecondary education                | 257 (75.8)                                               | <b>1.53 (1.16-2.01)</b>               | 311(91.3)                                                 | <b>2.24 (1.50-3.35)</b>               | 147 (54.6)                                                             | <b>1.49 (1.13-1.96)</b>               | 46 (15.4)                                                              | <b>2.21 (1.45-3.37)</b>               |
| University or College education             | 3207 (78.3)                                              | <b>1.76 (1.50-2.04)</b>               | 3760(91.7)                                                | <b>2.36 (1.95-2.85)</b>               | 2097 (64.6)                                                            | <b>2.25 (1.92-2.62)</b>               | 599 (17.1)                                                             | <b>2.50 (1.91-3.27)</b>               |
| <b>Marital Status</b>                       |                                                          |                                       |                                                           |                                       |                                                                        |                                       |                                                                        |                                       |
| No Partner                                  | 317 (68.2)                                               | 1.00                                  | 402 (86.6)                                                | 1.00                                  | 140 (40.0)                                                             | 1.00                                  | 27 (6.7)                                                               | 1.00                                  |
| Partner                                     | 3932 (75.9)                                              | <b>1.53 (1.24-1.88)</b>               | 4633(90.2)                                                | 1.41 (1.09-1.84)                      | 2500 (62.2)                                                            | <b>2.52 (2.01-3.16)</b>               | 697 (15.8)                                                             | <b>2.64 (1.74-3.99)</b>               |
| <b>Maternal Health Characteristics</b>      |                                                          |                                       |                                                           |                                       |                                                                        |                                       |                                                                        |                                       |
| <b>Previous depression diagnosis</b>        |                                                          |                                       |                                                           |                                       |                                                                        |                                       |                                                                        |                                       |
| No                                          | 3604 (76.2)                                              | 1.13 (0.96-1.33)                      | 4262(90.1)                                                | 1.19 (0.94-1.50)                      | 2267 (61.3)                                                            | <b>1.31 (1.10-1.54)</b>               | 618 (15.3)                                                             | 1.13 (0.88-1.43)                      |
| Yes                                         | 651 (73.4)                                               | 1.00                                  | 781 (88.5)                                                | 1.00                                  | 377 (54.8)                                                             | 1.00                                  | 105 (13.8)                                                             | 1.00                                  |
| <b>Pre-pregnancy BMI (kg/m<sup>2</sup>)</b> |                                                          |                                       |                                                           |                                       |                                                                        |                                       |                                                                        |                                       |
| Underweight                                 | 247 (75.5)                                               | 1.10(0.82-1.47)                       | 304(92.9)                                                 | <b>1.38 (1.14-1.64)</b>               | 158 (59.2)                                                             | 1.27 (0.96-1.68)                      | 45 (15.9)                                                              | 1.33 (0.89-1.97)                      |
| Normal                                      | 2539 (77.1)                                              | 1.21(1.05-1.39)                       | 2989(90.8)                                                | <b>1.82 (1.14-2.91)</b>               | 1674 (64.2)                                                            | <b>1.56 (1.36-1.80)</b>               | 460 (16.2)                                                             | <b>1.36 (1.13-1.63)</b>               |
| Overweight or Obese                         | 1405(73.7)                                               | 1.00                                  | 1675(87.7)                                                | 1.00                                  | 775 (53.4)                                                             | 1.00                                  | 201 (12.4)                                                             | 1.00                                  |
| <b>Pregnancy-Related Characteristics</b>    |                                                          |                                       |                                                           |                                       |                                                                        |                                       |                                                                        |                                       |
| <b>Gravidity</b>                            |                                                          |                                       |                                                           |                                       |                                                                        |                                       |                                                                        |                                       |
| Primigravida                                | 1558 (81.2)                                              | <b>1.57 (1.40-1.80)</b>               | 1786(92.6)                                                | <b>1.63 (1.34-1.97)</b>               | 880 (57.0)                                                             | 0.81(0.72-0.92)                       | 220 (13.3)                                                             | 0.81(0.67-0.97)                       |
| Multigravida                                | 2695 (73.2)                                              | 1.00                                  | 3252(88.4)                                                | 1.00                                  | 1760 (62.0)                                                            | 1.00                                  | 503 (16.0)                                                             | 1.00                                  |

\* Percentage of each breastfeeding practice with the characteristic in the row. †CI-Confidence Interval; ‡ Includes all women with complete information on exposures and outcome.

**Table 1: Bivariate analysis and unadjusted association of breastfeeding intention, initiation, 6-month exclusive breastfeeding and breastfeeding termination at 6 months with inadequate prenatal care and other potential predictors (Cont'd)**

| Independent Variables                     | Intended to Breastfeed |                         | Initiated Breastfeeding |                          | Terminated Breastfeeding at 6 months |                         | Exclusive Breastfeeding at 6-months |                         |
|-------------------------------------------|------------------------|-------------------------|-------------------------|--------------------------|--------------------------------------|-------------------------|-------------------------------------|-------------------------|
|                                           | N (%)*                 | Unadjusted OR (95%CI)†  | N (%)*                  | Unadjusted OR (95%CI)†   | N (%)*                               | Unadjusted OR (95%CI)†  | N (%)*                              | Unadjusted OR(95%CI)†   |
| <b>Reaction to pregnancy</b>              |                        |                         |                         |                          |                                      |                         |                                     |                         |
| Happy                                     | 3967(76.0)             | 1.25 (0.88-1.77)        | 4697(89.9)              | 0.84 (0.44-1.57)         | 2493(61.1)                           | 1.40 (0.97-2.02)        | 675(15.1)                           | 1.02 (0.61-1.73)        |
| Indifferent                               | 164(73.4)              | 1.09 (0.68-1.75)        | 198 (88.6)              | 0.96 (0.58-1.56)         | 81 (46.1)                            | 0.76 (0.48-1.22)        | 26 (13.3)                           | 0.88 (0.45-1.75)        |
| Unhappy                                   | 115(72.0)              | 1.00                    | 145(90.3)               | 1.00                     | 68 (52.9)                            | 1.00                    | 21 (14.8)                           | 1.00                    |
| <b>Health problems during pregnancy</b>   |                        |                         |                         |                          |                                      |                         |                                     |                         |
| No                                        | 3249(76.5)             | <b>1.17 (1.01-1.36)</b> | 3847(90.6)              | <b>1.37 (1.12-1.66)</b>  | 2054(61.4)                           | <b>1.20 (1.03-1.40)</b> | 574 (15.7)                          | <b>1.25 (1.02-1.53)</b> |
| Yes                                       | 1006(73.5)             | 1.00                    | 1200(87.6)              | 1.00                     | 595 (56.9)                           | 1.00                    | 151 (13.0)                          | 1.00                    |
| <b>Cigarette smoking during pregnancy</b> |                        |                         |                         |                          |                                      |                         |                                     |                         |
| No                                        | 3904(77.5)             | <b>2.14 (1.77-2.58)</b> | 4610(91.5)              | 3.49 (2.80-4.33)         | 2520(63.0)                           | <b>3.52 (2.80-4.42)</b> | 699 (16.2)                          | <b>3.57 (2.32-5.50)</b> |
| Yes                                       | 351(61.6)              | 1.00                    | 435 (75.6)              | 1.00                     | 126 (32.6)                           | 1.00                    | 26 (5.14)                           | 1.00                    |
| <b>Delivery Characteristics</b>           |                        |                         |                         |                          |                                      |                         |                                     |                         |
| <b>Type of PNC provider</b>               |                        |                         |                         |                          |                                      |                         |                                     |                         |
| Obs/Gyn                                   | 2388(73.6)             | 1.00                    | 2885(88.9)              | 1.00                     | 1457(58.0)                           | 1.00                    | 375 (13.5)                          | 1.00                    |
| Family Doctor                             | 1500(76.8)             | <b>1.19 (1.05-1.36)</b> | 1766(90.3)              | 1.16 (0.97-1.4)          | 929 (60.7)                           | 1.12 (0.98-1.28)        | 253 (15.0)                          | 1.13 (0.94-1.36)        |
| Midwife                                   | 317(90.0)              | <b>3.22(2.20-4.70)</b>  | 340 (96.8)              | <b>3.72 (1.87-7.41)</b>  | 233(7.5)                             | <b>2.82 (2.07-3.84)</b> | 90 (29.5)                           | <b>2.67 (1.98-3.60)</b> |
| Nurse or other                            | 38(75.5)               | 1.10(0.63-1.95)         | 42(86.2)                | 0.78 (0.49-0.38)         | 21 (53.4)                            | 0.83(0.44-1.54)         | 3 (7.90)                            | 0.55 (0.20-1.49)        |
| <b>Type of Delivery</b>                   |                        |                         |                         |                          |                                      |                         |                                     |                         |
| Vaginal                                   | 3209(77.0)             | <b>1.26 (1.09-1.43)</b> | 3768(90.3)              | 1.17 (0.97-1.43)         | 2023(61.6)                           | <b>1.24 (1.08-1.43)</b> | 566 (15.7)                          | <b>1.25 (1.02-1.53)</b> |
| Cesarean                                  | 1051(72.6)             | 1.00                    | 1284(88.7)              | 1.00                     | 626 (56.4)                           | 1.00                    | 159 (13.0)                          | 1.00                    |
| <b>Birth Setting</b>                      |                        |                         |                         |                          |                                      |                         |                                     |                         |
| Hospital                                  | 4149 (75.5)            | 1.00                    | 4833(89.9)              | 1.00                     | 2560(59.7)                           | 1.00                    | 682 (14.5)                          | 1.00                    |
| Birthing center/Private home              | 106 (89.2)             | <b>2.67 (1.32-5.42)</b> | 112(87.4)               | 3.61 (0.98-10.9)         | 87(87.6)                             | <b>4.80 (2.39-9.65)</b> | 41 (39.7)                           | <b>4.80 (2.39-9.65)</b> |
| <b>Postpartum Characteristics</b>         |                        |                         |                         |                          |                                      |                         |                                     |                         |
| <b>Baby's admission to the NICU</b>       |                        |                         |                         |                          |                                      |                         |                                     |                         |
| No                                        | 3739(76.3)             | <b>1.23 (1.03-1.47)</b> | 4440(90.6)              | <b>1.77 (1.42 -2.21)</b> | 2383(62.0)                           | <b>1.71 (1.42-2.06)</b> | 661 (15.7)                          | <b>1.61 (1.21-2.14)</b> |
| Yes                                       | 72(72.3)               | 1.00                    | 603 (84.5)              | 1.00                     | 264 (49.0)                           | 1.00                    | 63 (10.4)                           | 1.00                    |
| <b>Work after delivery</b>                |                        |                         |                         |                          |                                      |                         |                                     |                         |
| No                                        | 3678(76.0)             | 1.06 (0.88-1.26)        | 4366(90.2)              | <b>1.32 (1.05-1.66)</b>  | 2301(61.2)                           | <b>1.30 (1.07-1.55)</b> | 642 (15.6)                          | <b>1.40 (1.09-1.80)</b> |
| Yes                                       | 572(75.0)              | 1.00                    | 670 (87.5)              | 1.00                     | 340 (54.9)                           | 1.00                    | 81 (11.7)                           | 1.00                    |
| <b>Support after delivery</b>             |                        |                         |                         |                          |                                      |                         |                                     |                         |
| All of the time /Most of the time         | 3642(76.7)             | 1.18 (0.89-1.57)        | 4274(89.9)              | 1.17 (0.80-1.70)         | 2228(60.0)                           | 0.89 (0.67-1.18)        | 602 (14.8)                          | 0.70 (0.45-1.09)        |
| Some of the time                          | 384 (69.2)             | 0.80 (0.58-1.12)        | 499 (90.2)              | 1.21 (0.75-1.93)         | 273 (61.4)                           | 0.94 (0.66-1.34)        | 71 (14.8)                           | 0.69 (0.49-1.00)        |
| None /Little of the time                  | 228 (73.5)             | 1.00                    | 274 (88.4)              | 1.00                     | 147 (62.7)                           | 1.00                    | 52 (19.9)                           | 1.00                    |
| <b>Intimate Partner Violence</b>          |                        |                         |                         |                          |                                      |                         |                                     |                         |
| No                                        | 3799 (76.0)            | 1.04 (0.86-1.27)        | 4499(90.0)              | 1.11(0.86-1.46)          | 2411(61.7)                           | <b>1.66 (1.36-2.01)</b> | 669 (15.6)                          | <b>1.54 (1.13-2.09)</b> |
| Yes                                       | 450 (75.2)             | 1.00                    | 5032(89.9)              | 1.00                     | 231 (49.3)                           | 1.00                    | 56 (10.7)                           | 1.00                    |

\* Percentage of each breastfeeding practice with the characteristic in the row. †CI-Confidence Interval
