# Supplementary material for: Inadequate prenatal care use and breastfeeding practices in Canada: a national survey of women
Source: Springer Nature journal article supplement (doi:10.1186/s12884-016-0889-9), 2016-05-05
Supplement: MOESM2 [file 10110846]

14  
15  
16  
17  
18  
19  
20  
21  
22  
23  
24  
25  
26  
27  
28  
29  
30  
31  
32  
33  
34  
35  
36  
37  
38  
39  
40  
41  
42  
43  
44  
45  
46  
47  
48  
49  
50  
51  
52  
53  
54  
55  
56  
57  
58  
59  
60  
61  
62  
63  
64  
65

**Table 2: Adjusted association of breastfeeding intention, initiation, any breastfeeding at 6 months, and 6 month exclusive breastfeeding with inadequate prenatal care and other potential predictors**

| Independent Variables                       | Intended to Breastfeed  | Initiated Breastfeeding | Terminated Breastfeeding at 6 months | Exclusive Breastfeeding at 6-months |
|---------------------------------------------|-------------------------|-------------------------|--------------------------------------|-------------------------------------|
|                                             | Adjusted OR(95%CI)†     | Adjusted OR (95%CI)†    | Adjusted OR (95%CI)†                 | Adjusted OR (95%CI)†                |
| <b>Adequacy of Services</b>                 |                         |                         |                                      |                                     |
| Adequate                                    | 1.19 (0.98-1.43)        | 1.07 (0.82-1.41)        | 1.08 (0.91-1.29)                     | 1.07 (0.84 -1.37)                   |
| Inadequate                                  | 1.00                    | 1.00                    | 1.00                                 | 1.00                                |
| <b>Adequacy of Initiation</b>               |                         |                         |                                      |                                     |
| Weeks 1-17                                  | 1.19 (0.73-1.94)        | 1.47 (0.82-2.65)        | 0.99 (0.54-1.81)                     | 0.95 (0.45-2.03)                    |
| Weeks 18 and above                          | 1.00                    | 1.00                    | 1.00                                 | 1.00                                |
| <b>Maternal Demographics</b>                |                         |                         |                                      |                                     |
| <b>Maternal age in years</b>                |                         |                         |                                      |                                     |
| <20                                         | 1.00                    | 1.00                    | 1.00                                 | 1.00                                |
| 20-39                                       | 0.99 (0.69-1.44)        | 1.34 (0.88-2.03)        | <b>2.03 (1.40-3.05)</b>              | 1.38 (0.69-2.77)                    |
| >=40                                        | 1.41(0.76-2.53)         | 1.45(0.65-3.28)         | <b>5.11 (2.68-9.77)</b>              | 2.21 (0.92-5.34)                    |
| <b>Urban-rural residence</b>                |                         |                         |                                      |                                     |
| Rural area                                  | 1.00                    | 1.00                    | 1.00                                 | 1.00                                |
| Urban, population ≤499,999                  | 1.06(0.88-1.27)         | 1.10 (0.87-1.40)        | 1.03 (0.85-1.23)                     | 0.93 (0.73-1.18)                    |
| Urban, population ≥500,000                  | 1.09(0.89-1.32)         | 1.37 (1.05-1.79)        | <b>1.24 (1.01-1.52)</b>              | 0.98 (0.77-1.27)                    |
| <b>Immigration to Canada</b>                |                         |                         |                                      |                                     |
| No                                          | <b>1.27 (1.05-1.54)</b> | <b>0.60 (0.54-0.99)</b> | <b>0.76 (0.62-0.93)</b>              | 0.82 (0.5-1.04)                     |
| Yes                                         | 1.00                    | 1.00                    | 1.00                                 | 1.00                                |
| <b>Level of education</b>                   |                         |                         |                                      |                                     |
| High school or less                         | 1.00                    | 1.00                    | 1.00                                 | 1.00                                |
| Some postsecondary education                | <b>1.51 (1.11-2.04)</b> | <b>2.41 (1.56-3.73)</b> | <b>1.33 (1.01-1.82)</b>              | <b>1.94 (1.25-3.03)</b>             |
| University or College education             | <b>1.50 (1.25-1.78)</b> | <b>1.88 (1.50-2.37)</b> | <b>1.68 (1.40-2.02)</b>              | <b>1.90 (1.40-2.53)</b>             |
| <b>Marital Status</b>                       |                         |                         |                                      |                                     |
| No Partner                                  | 1.00                    | 1.00                    | 1.00                                 | 1.00                                |
| Partner                                     | <b>1.28 (1.02-1.64)</b> | <b>1.23 (1.01-1.38)</b> | <b>1.48 (1.04-1.38)</b>              | <b>1.70 (1.05-2.07)</b>             |
| <b>Maternal Health Characteristics</b>      |                         |                         |                                      |                                     |
| <b>Previous depression diagnosis</b>        |                         |                         |                                      |                                     |
| No                                          | 0.98 (0.82-1.19)        | 0.91 (0.70-1.17)        | 0.99 (0.81-1.2)                      | 0.94 (0.870-1.23)                   |
| Yes                                         | 1.00                    | 1.00                    | 1.00                                 | 1.00                                |
| <b>Pre-pregnancy BMI (kg/m<sup>2</sup>)</b> |                         |                         |                                      |                                     |
| Underweight                                 | 1.13(0.82-1.47)         | <b>1.21(1.00-1.47)</b>  | <b>1.40 (1.02-1.47)</b>              | <b>1.37 (1.01-2.12)</b>             |
| Normal                                      | 1.21(0.87-1.67)         | <b>1.73(1.03-1.87)</b>  | <b>1.50 (1.3-1.75)</b>               | <b>1.24 (1.02-1.51)</b>             |
| Overweight or Obese                         | 1.00                    | 1.00                    | 1.00                                 | 1.00                                |

†CI-Confidence Interval

14

15

16

17

18

19

20

21

22

23

24

25

26

27

28

29

30

31

32

33

34

35

36

37

38

39

40

41

42

43

44

45

46

47

48

49

50

51

52

53

54

55

56

57

58

59

60

61

62

63

64

65

**Table 2: Adjusted association of breastfeeding intention, initiation, any breastfeeding at 6 months, and 6 month exclusive breastfeeding with inadequate prenatal care and other potential predictors (Cont'd)**

| Independent Variables                           | Intended to Breastfeed  | Initiated Breastfeeding | Terminated Breastfeeding at 6 months | Exclusive Breastfeeding at 6-months |
|-------------------------------------------------|-------------------------|-------------------------|--------------------------------------|-------------------------------------|
|                                                 | Adjusted OR (95%CI)†    | Adjusted OR(95%CI)†     | Adjusted OR (95%CI)†                 | Adjusted OR (95%CI)†                |
| <b><i>Pregnancy-Related Characteristics</i></b> |                         |                         |                                      |                                     |
| <b>Gravidity</b>                                |                         |                         |                                      |                                     |
| Primigravida                                    | <b>1.54 (1.33-1.79)</b> | <b>1.64 (1.33-2.03)</b> | <b>1.18 (1.04-2.56)</b>              | <b>1.19 (1.02-2.68)</b>             |
| Multigravida                                    | 1.00                    | 1.00                    | 1.00                                 | 1.00                                |
| <b>Reaction to pregnancy</b>                    |                         |                         |                                      |                                     |
| Happy                                           | 1.08 (0.64-1.82)        | 0.78 (0.38-1.58)        | 0.87 (0.51-1.50)                     | 0.85 (0.49-1.47)                    |
| Indifferent                                     | 0.92 (0.62-1.37)        | 0.76 (0.43-1.32)        | 1.12 (0.73-1.73)                     | 0.95 (0.47-1.93)                    |
| Unhappy                                         | 1.00                    | 1.00                    | 1.00                                 | 1.00                                |
| <b>Health problems during pregnancy</b>         |                         |                         |                                      |                                     |
| No                                              | 1.16(0.98-1.37)         | 1.22(0.98-1.52)         | 1.08 (0.93-1.28)                     | 1.14 (0.91-1.42)                    |
| Yes                                             | 1.00                    | 1.00                    | 1.00                                 | 1.00                                |
| <b>Cigarette smoking during pregnancy</b>       |                         |                         |                                      |                                     |
| No                                              | <b>2.07 (1.66-2.58)</b> | <b>2.53 (1.94-3.30)</b> | <b>2.52 (1.95-3.26)</b>              | <b>2.76 (1.71-4.44)</b>             |
| Yes                                             | 1.00                    | 1.00                    | 1.00                                 | 1.00                                |
| <b><i>Delivery Characteristics</i></b>          |                         |                         |                                      |                                     |
| <b>Type of PNC provider</b>                     |                         |                         |                                      |                                     |
| Obs/Gyn                                         | 1.00                    | 1.00                    | 1.00                                 | 1.00                                |
| Family Doctor                                   | <b>1.20 (1.04-1.39)</b> | <b>1.47 (1.21-1.80)</b> | <b>1.31 (1.12-1.54)</b>              | <b>1.26 (1.02-1.54)</b>             |
| Midwife                                         | <b>2.60(1.69-4.03)</b>  | <b>3.60 (1.61-7.87)</b> | <b>2.28 (1.57-3.32)</b>              | <b>1.91 (1.31-2.78)</b>             |
| Nurse or nurse practitioner/other               | 1.10(0.71-2.52)         | 1.10(0.71-2.52)         | 1.16(0.71-2.52)                      | 0.99(0.71-2.52)                     |
| <b>Type of Delivery</b>                         |                         |                         |                                      |                                     |
| Vaginal                                         | <b>1.27 (1.09-1.47)</b> | 1.14 (0.92-1.42)        | 1.18 (1.00-1.39)                     | 1.13 (0.91-1.40)                    |
| Cesarean                                        | 1.00                    | 1.00                    | 1.00                                 | 1.00                                |
| <b>Birth Setting</b>                            |                         |                         |                                      |                                     |
| Hospital                                        | 1.00                    | 1.00                    | 1.00                                 | 1.00                                |
| Birthing center/Private home                    | 1.44 (0.94-11.23)       | 2.35 (0.91-12.88)       | <b>2.83 (1.17-6.83)</b>              | <b>2.41 (1.34-4.03)</b>             |
| <b><i>Postpartum Characteristics</i></b>        |                         |                         |                                      |                                     |
| <b>Baby's admission to the NICU</b>             |                         |                         |                                      |                                     |
| No                                              | <b>1.23 (1.03-1.47)</b> | <b>1.67 (1.31-2.13)</b> | <b>1.59 (1.30-1.95)</b>              | <b>1.32 (1.30-1.95)</b>             |
| Yes                                             | 1.00                    | 1.00                    | 1.00                                 | 1.00                                |
| <b>Work after delivery</b>                      |                         |                         |                                      |                                     |
| No                                              | 1.13 (0.94-1.37)        | 1.29 (0.99-1.66)        | <b>1.30 (1.07-1.58)</b>              | <b>1.40 (1.07-1.58)</b>             |
| Yes                                             | 1.00                    | 1.00                    | 1.00                                 | 1.00                                |
| <b>Support After delivery</b>                   |                         |                         |                                      |                                     |
| All of the time /Most of the time               | 1.02 (0.73-1.40)        | 1.09 (0.70-1.70)        | 0.88 (0.60-1.32)                     | 0.62 (0.37-1.02)                    |
| Some of the time                                | 0.74 (0.51-1.08)        | 0.99 (0.58-1.67)        | 0.99 (0.64-1.24)                     | 0.69 (0.46-1.05)                    |
| None /Little of the time                        | 1.00                    | 1.00                    | 1.00                                 | 1.00                                |
| <b>Intimate Partner Violence</b>                |                         |                         |                                      |                                     |
| No                                              | 0.83 (0.66-1.04)        | 0.72 (0.52-1.01)        | 1.15 (0.92-1.45)                     | 1.23 (0.86-1.77)                    |
| Yes                                             | 1.00                    | 1.00                    | 1.00                                 | 1.00                                |

†CI-Confidence Interval
